# Supplementary material
Source: Springer Nature journal article supplement (https://www.springermedizin.de/resource/supplementary/12958_2005_294_MOESM4_ESM.pdf/9567560)

*Sus scrofa*

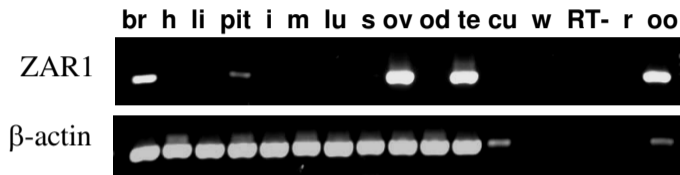

*Bos taurus*

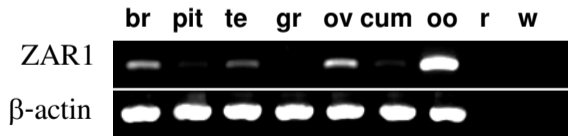

Supplement: MOESM4 [file 9567560]
